# Supplementary material for: Analysis of canine gene constraint identifies new variants for orofacial clefts and stature
Source: HighWire-hosted journal article supplement (doi:10.1101/gr.280092.124), 2025-03-24
Supplement: Supplemental_Table_S13.xlsx [file Supplemental_Table_S13.xlsx]

## Sheet: Supplemental Table S13
Supplemental Table S13: Catalburun PDGFRA genotypes
Dog ID	Sequencing method	Genotype
110	Sanger	C/A
210	Sanger	C/A
310	Sanger	C/A
410	Sanger	C/A
510	Sanger	C/A
610	Sanger	C/A
710	Sanger	C/A
810	Sanger	C/A
910	Sanger	C/A
1110	Sanger	C/A
1211	Sanger	A/A
1411	Sanger	C/A
1511	Sanger	C/A
1611	Sanger	C/A
