# Supplementary material for: Analysis of canine gene constraint identifies new variants for orofacial clefts and stature
Source: HighWire-hosted journal article supplement (doi:10.1101/gr.280092.124), 2025-03-24
Supplement: Supplemental_Table_S25.xlsx [file Supplemental_Table_S25.xlsx]

## Sheet: Supplemental Table S25
Supplemental Table S25: Duplicate and first-degree relative filtering
Dataset	SRA	Dog10K	Total
Pass samples	1146	1778	2943
Duplicates removed1	613	1778	2391
First-degree relatives removed	572	1719	2291
1 If samples were duplicated across both SRA and Dog10K, the Dog10K sample was kept and the SRA sample was removed.
